# Supplementary material
Source: PubMed Central journal article supplement (PMC5178977)
Supplement: NIHMS828971-supplement.pdf [file NIHMS828971-supplement.pdf]

## 1 **Supplementary Material**

2

### 3 **Figure Legends**

4

#### 5 **Supplementary Figure 1: ACC1 protein levels and gene expression in quiescent fibroblasts.**

6 Early passage human fibroblasts were incubated either in complete media (with 10 % FBS) (Ctl),  
7 made quiescent by incubating in media with 0.1% FBS for three days (Quies) or incubated in  
8 complete media with doxorubicin (Doxo) as described in figure 1. (A) ACC1 levels, ATM  
9 phosphorylation (p-ATM), p53 phosphorylation (p-p53), p53, p21 and pRb phosphorylation (p-  
10 pRB) were assessed by Western blot; tubulin was used as loading control. (B) Cell proliferation  
11 was measured by immunofluorescence as BrdU incorporation to nuclear DNA, original  
12 magnification X200. The percentage of cells with positive nuclear staining is shown below the  
13 picture. (C) The graph shows the data obtained after quantifying independent Western blots and  
14 normalizing ACC1 levels by tubulin. (D) ACC1 mRNA levels were determined. Results are  
15 expressed as the mean  $\pm$  SEM ( $n \geq 4$ , \* $P < 0.05$ , \*\* $P < 0.005$ ).

16

#### 17 **Supplementary Figure 2: Inhibition of lipid synthesis induces senescence in human**

18 **fibroblasts.** (A and B) Early passage fibroblasts were transduced with lentiviral particles  
19 harboring either a control plasmid or shRNA constructs directed against either ACC1 or FAS and  
20 selected with puromycin. Enzyme levels were assessed by Western blot four days after  
21 transduction. (C) SA- $\beta$ -Gal staining in cells transduced with lentiviral particles carrying either a  
22 control plasmid, a shRNA sequence that does not target any known human gene (NT) or different  
23 shRNA constructs directed against either ACC1 or FAS. (D) Treatment with the FAS inhibitor

24 C75 demonstrating a concentration dependent inhibition of lipid synthesis. (E) Similar analysis  
25 using the ACC1 inhibitor TOFA. (F) Corresponding SA- $\beta$ -Gal levels in cells treated with a  
26 vehicle control, C75 (50  $\mu$ M) or TOFA (4.5  $\mu$ M) for 5 days. (Results are expressed as the mean  $\pm$   
27 SE ( $n \geq 3$ , \* $P < 0.05$ , \*\* $P < 0.005$ , \*\*\* $P < 0.0005$ ).

28

29 **Supplementary Figure 3: N-Acetyl cysteine inhibits p38 MAPK and H2AX**

30 **phosphorylation.** Early passage human fibroblasts were transduced with lentiviral particles

31 containing either a control or an ACC1 specific shRNA. Twenty-four hours after the infection the

32 cells were switched to media with NAC (0.75 mM) or with the p38 inhibitor SB203580 (8  $\mu$ M).

33 (A) Five days after infection, p-p38 and p38 and ACC1 levels were assessed by Western blot.

34 The bands corresponding to p-p38 MAPK and p38 MAPK were quantified, the ratio between

35 them calculated and expressed relative to shACC1 (B) Five days after infection  $\gamma$ -H2AX were

36 assessed by Western blot, the bands were quantified and expressed relative to  $\gamma$ -H2AX levels in

37 shACC1 treated cells. Results are expressed as the mean  $\pm$  SEM ( $n \geq 2$ , \*\*\* $P < 0.0005$  Ctl vs.

38 shACC1; # $P \leq 0.05$  shACC1+NAC vs. ACC1 or shACC1+SB vs. shACC1).

39

40 **Supplementary Figure 4: N-Acetyl cysteine does not restore proliferation of cells lacking**

41 **ACC1.** Human fibroblasts were transduced with lentiviral particles carrying either a control

42 plasmid or shRNA directed at ACC1 and selected with puromycin. Cells were incubated in

43 absence and in presence of 0.75 mM N-acetylcysteine (NAC) as described in Figure 5C. (A) Cell

44 proliferation was measured as [methyl  $^3$ H]-thymidine incorporation into DNA per mg of protein

45 and expressed relative to control values. (B) pRb phosphorylation (p-pRB) was assessed by

46 Western blot, and GAPDH was used as loading control. Results are expressed as the mean  $\pm$  SE

47 ( $n=3$ , \* $P < 0.05$ ).

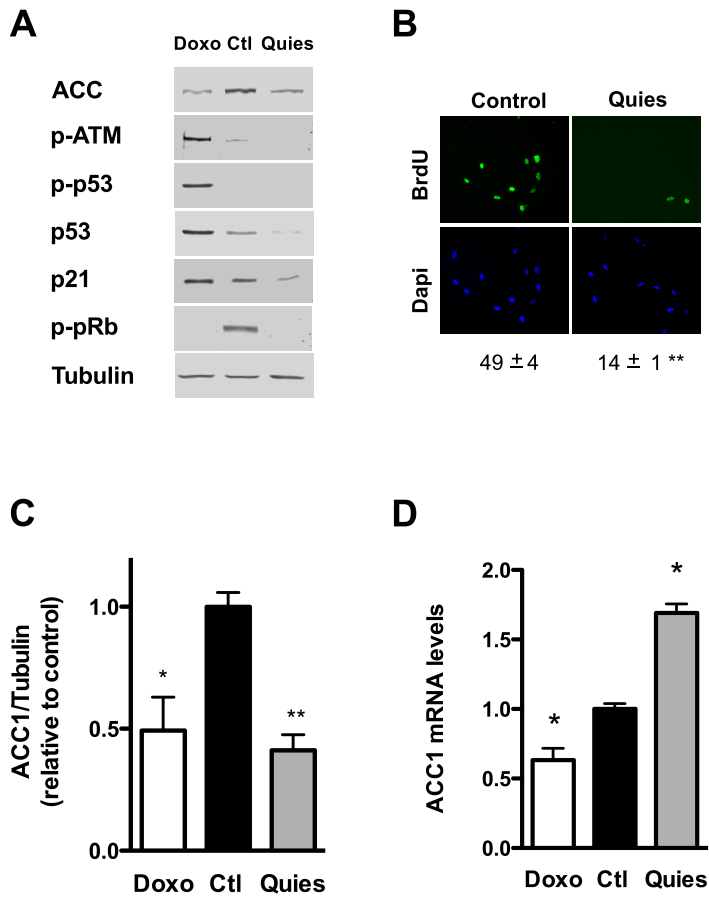

**Figure S1**

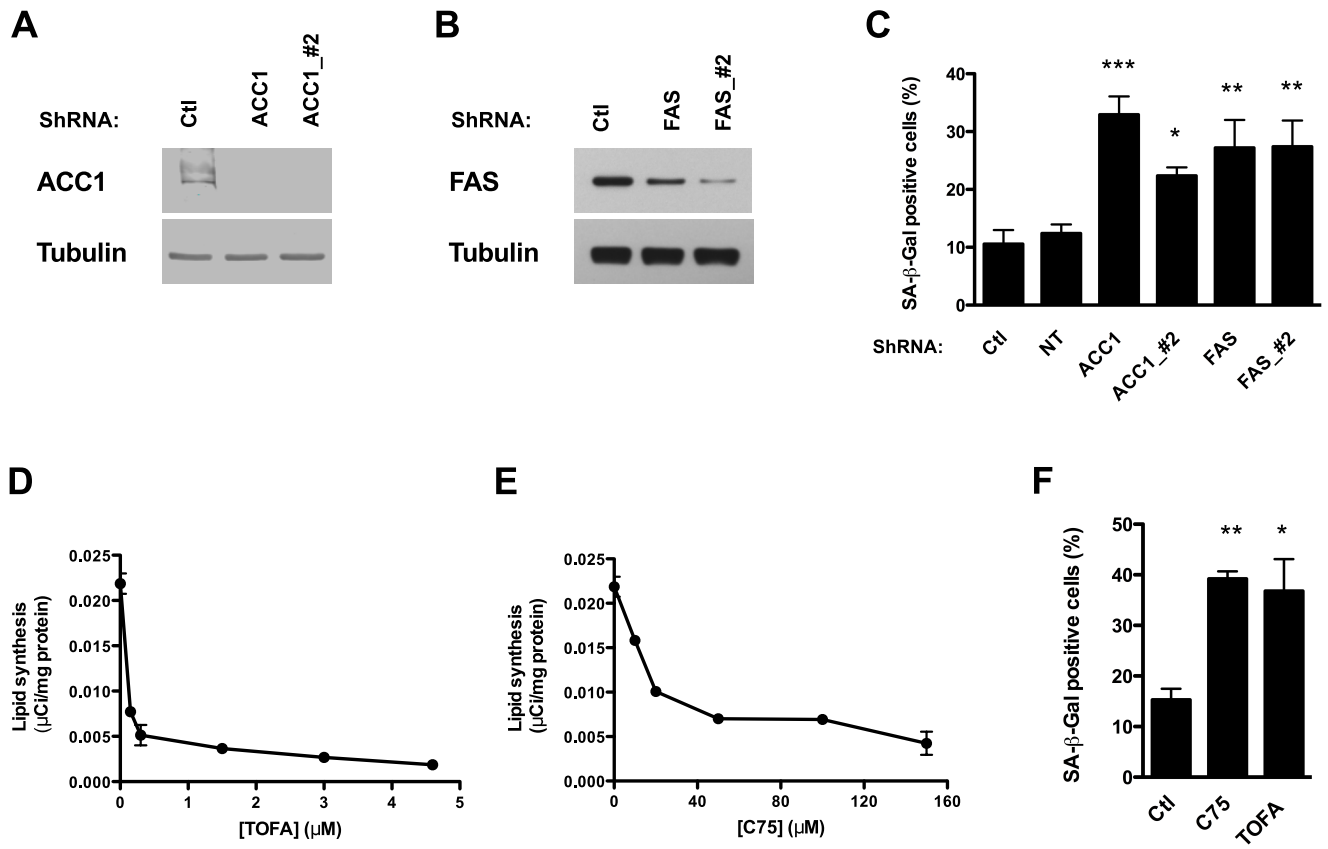

Figure S2

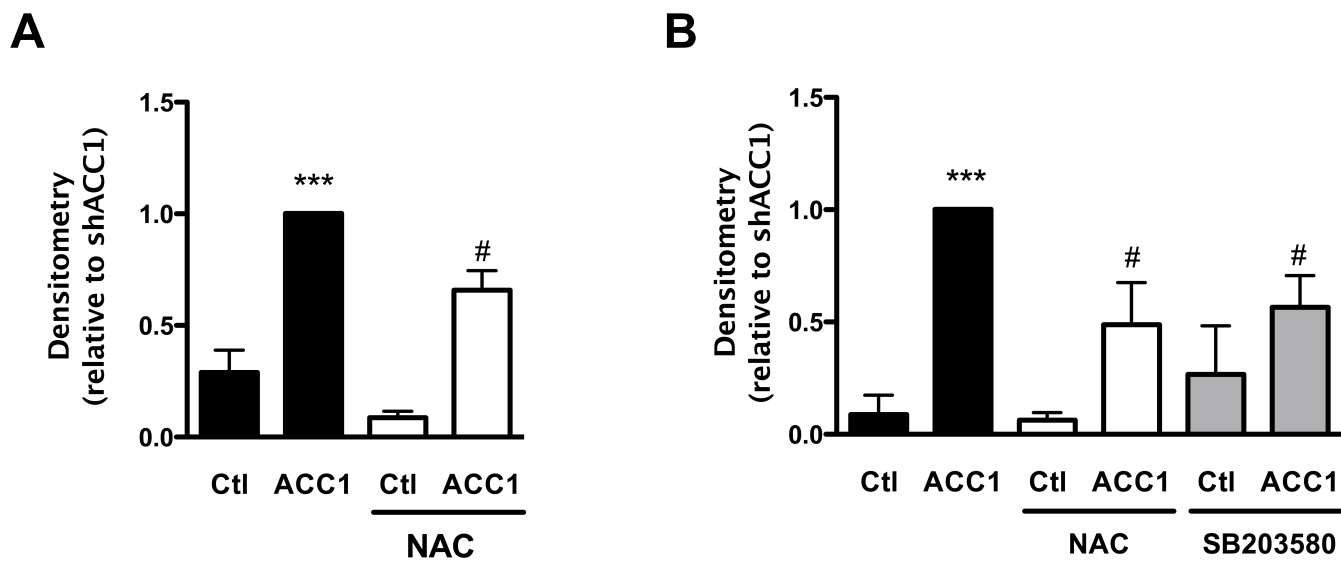

Figure S3

**A**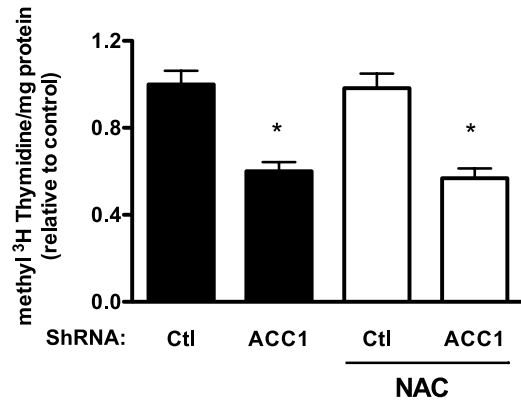**B**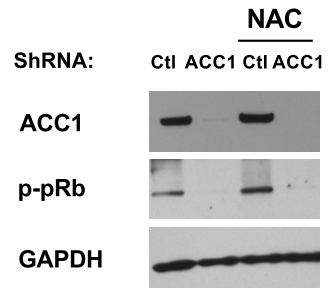**Figure S4**
